# Supplementary material
Source: PubMed Central journal article supplement (PMC5785239)
Supplement: NIHMS935486-supplement-Suppl_Table.pdf [file NIHMS935486-supplement-Suppl_Table.pdf]

224 **Supplementary Table 1. Primers sequences used for RT-PCR**

225

226

| <b>Gene (Mice)</b> | <b>Forward primer (5'-3')</b>  | <b>Reverse primer (5'-3')</b> |
|--------------------|--------------------------------|-------------------------------|
| Cdkn2a             | AATCTCCGCGAGGAAAGC             | GTCTGCAGCGGACTCCATS           |
| Cdkn1a             | ATTCCATAGGCGTGGGACCT           | TCCTGGGCATTTCCGGTCAC          |
| Il6                | GCTACCAAACCTGGATATAATCA<br>GGA | CCAGGTAGCTATGGTACTCCAGA<br>A  |
| Mmp13              | GGAGCCCTGATGTTTCCCAT           | GTCTTCATCGCCTGGACCATA         |
| Il1β               | GTATGGGCTGGACTGTTTC            | GCTGTCTGCTCATTACAG            |
| Sox9               | ACCCACAGCTCCCCTGAAG            | CTCACCTTCAGTGGCAAGAGC         |
| Col2a1             | CCTCCGTCTACTGTCCACTGA          | ATTGGAGCCCTGGATGAGCA          |
| Acan               | CGTTGCAGACCAGGAGCAAT           | CGGTCATGAAAGTGGCGGTA          |
| Runx2              | GCCGGGAATGATGAGAATA            | GGTGAAACTCTTGCCCTCGTC         |
| Bglap              | GGCGCTACCTTGGGTAAAGTG          | GACCACTCCAGCACAACCTCC         |
| Ctsk               | GCACCCTTAGTCTTCCGCTC           | ACCCACATCCTGCTGTTGAG          |
| Rankl              | GAGCACGAAAACTGGTCGG            | AGGGTTGGACACCTGAATGC          |
| Opg                | CAGCCATTTGCACACCTCAC           | TTAGAGATCTTGGCCAGCC           |
| β-actin            | CAACCGTGAAAAGATGACCC           | GTAGATGGGCACAGTGTGGG          |

227

| <b>Gene (human)</b> | <b>Forward primer (5'-3')</b> | <b>Reverse primer (5'-3')</b> |
|---------------------|-------------------------------|-------------------------------|
| cdkn2a              | AGCTGGAATTACACAGCTGC          | GGACTGGCTTGCAATCTTGT          |
| mmp3                | CACTCACAGACCTGACTCGG          | GAGTCAGGGGGAGGTCCATA          |
| il6                 | CCCCTGACCCAACCACAAAT          | ATTTGCCGAAGAGCCCTCAG          |
| mmp13               | TGGTCCAGGAGATGAAGACC          | TCCTCGGAGACTGGTAATGG          |
| il1β                | GGACAAGCTGAGGAAGATGC          | TCGTTATCCCATGTGTGCGAA         |
| col2a1              | CGCCGCTGTCCTTCGGTGTC          | AGGGCTCCGGCTTCCACACAT         |
| acan                | TGGGAACCAGCCTATACCCCA<br>G    | CAGTTGCAGAAGGGCCTTCTGTA<br>C  |
| β-actin             | GCTCCTCCTGAGCGCAAGTAC         | GGACTCGTCATACTCCTGCTTGC       |
